# Supplementary material for: Performance of a deep learning based neural network in the selection of human blastocysts for implantation
Source: eLife journal article supplement (doi:10.7554/elife.55301), 2020-09-14
Supplement: supp [file elife_poa_e55301_Supplementary_file_1.docx]

Title: Performance of a deep learning based neural network in the selection of human blastocysts for implantation

**Authors:** Charles L Bormann1,2†, Manoj Kumar Kanakasabapathy3†, Prudhvi Thirumalaraju3†, Raghav Gupta3, Rohan Pooniwala3, Hemanth Kandula3, Eduardo Hariton1, Irene Souter1,2, Irene Dimitriadis1,2, Leslie B. Ramirez3, Carol L. Curchoe4,5, Jason E. Swain5, Lynn M. Boehnlein6, Hadi Shafiee2,7*

**Affiliations:**

1Division of Reproductive Endocrinology and Infertility, Department of Obstetrics and Gynecology, Massachusetts General Hospital, Harvard Medical School, Boston, MA, USA

2Department of Medicine, Harvard Medical School, Boston, MA, USA.

3Extend Fertility, New York, NY, USA.

4San Diego Fertility Center, San Diego, CA, USA.

5Colorado Center for Reproductive Medicine IVF Laboratory Network, Englewood, CO

6Division of Reproductive Endocrinology and Infertility, Department of Obstetrics and Gynecology, University of Wisconsin, Madison, WI, USA.

7Division of Engineering in Medicine, Department of Medicine, Brigham and Women’s Hospital, Harvard Medical School, Boston, MA, USA.

*Corresponding author. E-mail: hshafiee@bwh.harvard.edu

† These authors contributed equally to this work

**Supplementary file 1A.** **Patient population characteristics.** All embryo images (except the PGT screened embryos) utilized for experiments reported in the study were obtained from cycles that belong to the presented distribution of parameters. All values in table are presented as median along with the range unless noted otherwise.

| Characteristics information |  |
| --- | --- |
| Cycle characteristics | Test data set (n=97) |
| Age, years | 34 (43 - 24) |
| Day 3 follicle stimulating hormone, IU/L | 7 (12 - 4) |
| aBody mass index, kg/m2 | 23 (39 - 17) |
| Oocytes retrived, n | 12 (27 - 6) |
| Mature (MII) oocytes, n | 11 (27 - 4) |
| Normally fertilizations (2PN), n | 8 (20 - 3) |
| bFertilization method, n (%) |  |
| Conventional insemination | 27 (27.84) |
| Intracytoplasmic sperm injection | 70 (72.16) |
| bInfertility Diagnosis, n (%) |  |
| Diminished ovarian reserve | 7 (7.22) |
| Polycystic ovary syndrome | 11 (11.34) |
| Uterine | 3 (3.09) |
| Unexplained | 15 (15.46) |
| Male factor | 37 (38.14) |
| Tubal | 10 (10.31) |
| Endometriosis | 1 (1.03) |
| Idiopathic | 1 (1.03) |
| Other | 12 (12.37) |
| a n = 91  b Values represent the absolute count and percentage within the test set | |

**Supplementary file 1B.** **Total number of transfer outcomes for embryos selected by the network.** A total of 102 fresh-transfer embryos had known implantation outcomes (45 embryos implanted). 28 frozen transfers were performed by the clinic where 18 implanted. The table lists only embryos which were selected by the network with known outcomes for both fresh cycles and in frozen subsequent transfers.

| **Embryos selected by the network with known outcomes** |  |  | |
| --- | --- | --- | --- |
| **113 hpi** | |
|  |  | |
| **Fresh transfers** | 44 | |
| **Fresh transfers with successful implantation** | 26 | |
| **Frozen transfers** | 5 | |
| **Frozen transfers with successful implantation** | 4 | |

**Supplementary file 1C. Cycle characteristics of the euploid test set**. Embryos used in the euploid embryo differentiation experiment based on the implantation outcomes, originated from cycles that belong to presented distribution of characteristics. These cycles are independent of the original 97 patient cohort test set and also the training data sets. All values in table are presented as median along with the range unless noted otherwise.

| PGT screened euploid embryo cycle characteristics | |
| --- | --- |
| Cycle characteristic | **Test data set (n = 97)** |
| * Successful implantations, n (%) | 57 (58.76) |
| Available embryos, n | 5 (12, 1) |
| Patient age, n | 35 (47, 25) |
| Body mass index, kg/m2 | 23 (37, 17) |
| Day 3 follicle stimulating hormone, IU/L | 7 (13, 3) |
| Oocytes retrived, n | 15 (25, 2) |
| Normally fertilized (2PN) embryos, n | 9 (20, 2) |
| Number of blastocysts biopised, n | 5 (11, 1) |
| *Infertility diagnosis, n (%) |  |
| Diminished ovarian reserve | 12 (12.37) |
| PCOS | 6 (6.19) |
| Unexplained | 16 (16.49) |
| Male factor | 20 (20.62) |
| Tubal | 9 (9.28) |
| Other | 31 (31.96) |
| Recurrent pregnancy loss | 3 (3.09) |
| * Values represent the absolute count and percentage within the test set | |
